# Supplementary material for: Carboxylic acids and light interact to affect nanoceria stability and dissolution in acidic aqueous environments
Source: publisher site journal article supplement (doi:10.3762/bjnano.14.63), 2023-06-27
Supplement: Additional file 1 [file 2190-4286-14-63-S1.pdf]

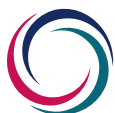

## Supporting Information

for

### **Carboxylic acids and light interact to affect nanoceria stability and dissolution in acidic aqueous environments**

Matthew L. Hancock, Eric A. Grulke and Robert A. Yokel

*Beilstein J. Nanotechnol.* **2023**, *14*, 762–780. [doi:10.3762/bjnano.14.63](https://doi.org/10.3762/bjnano.14.63)

## Additional experimental data

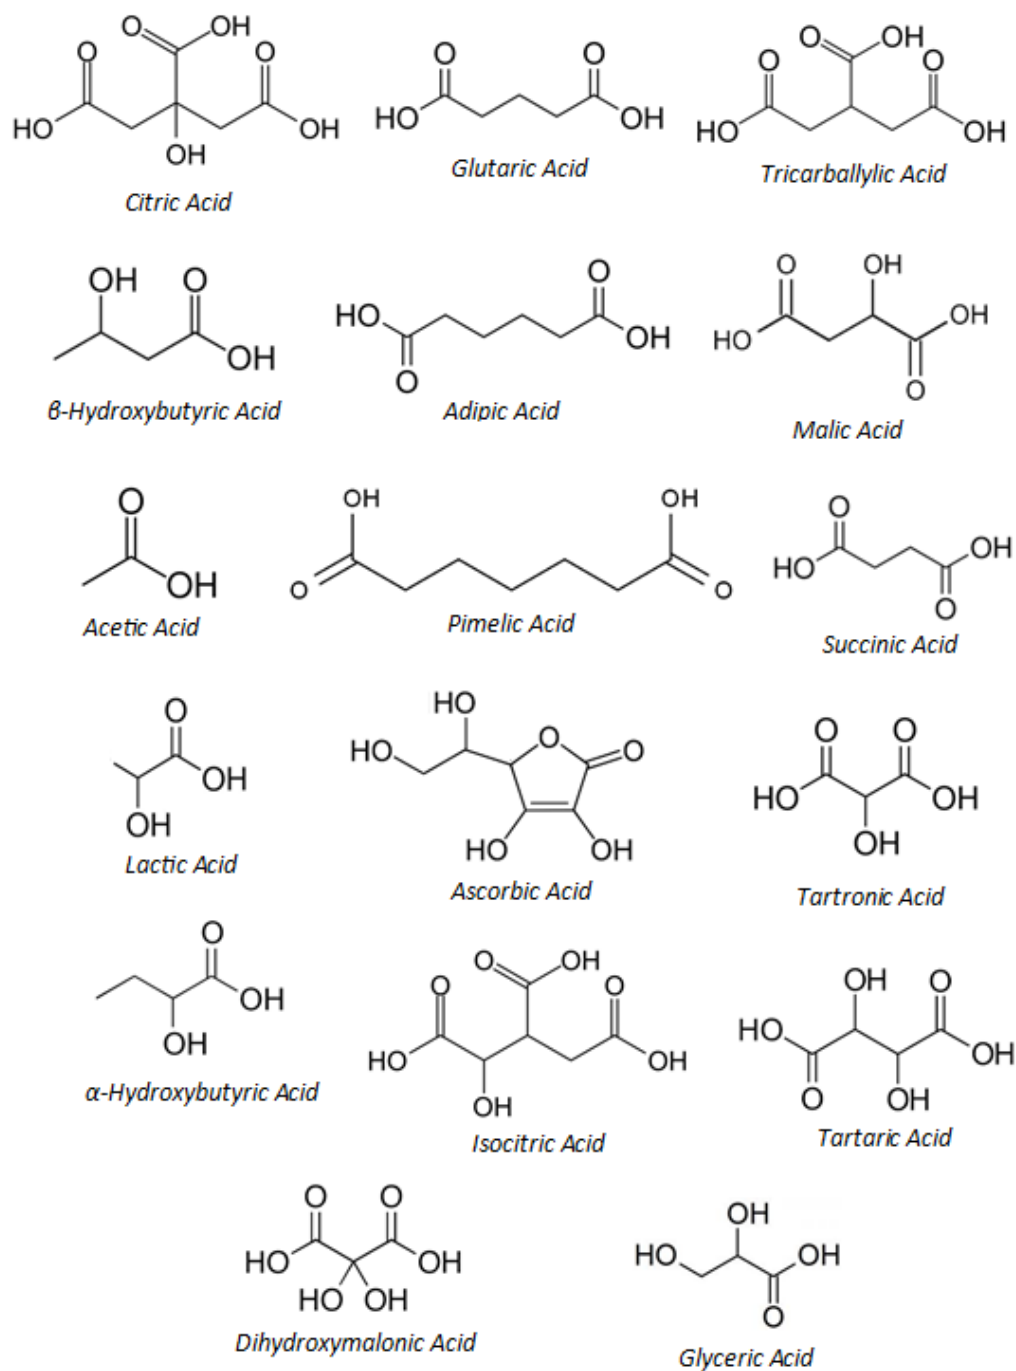

**Figure S1:** Molecular structures of the sixteen carboxylic acids and ascorbic acid.

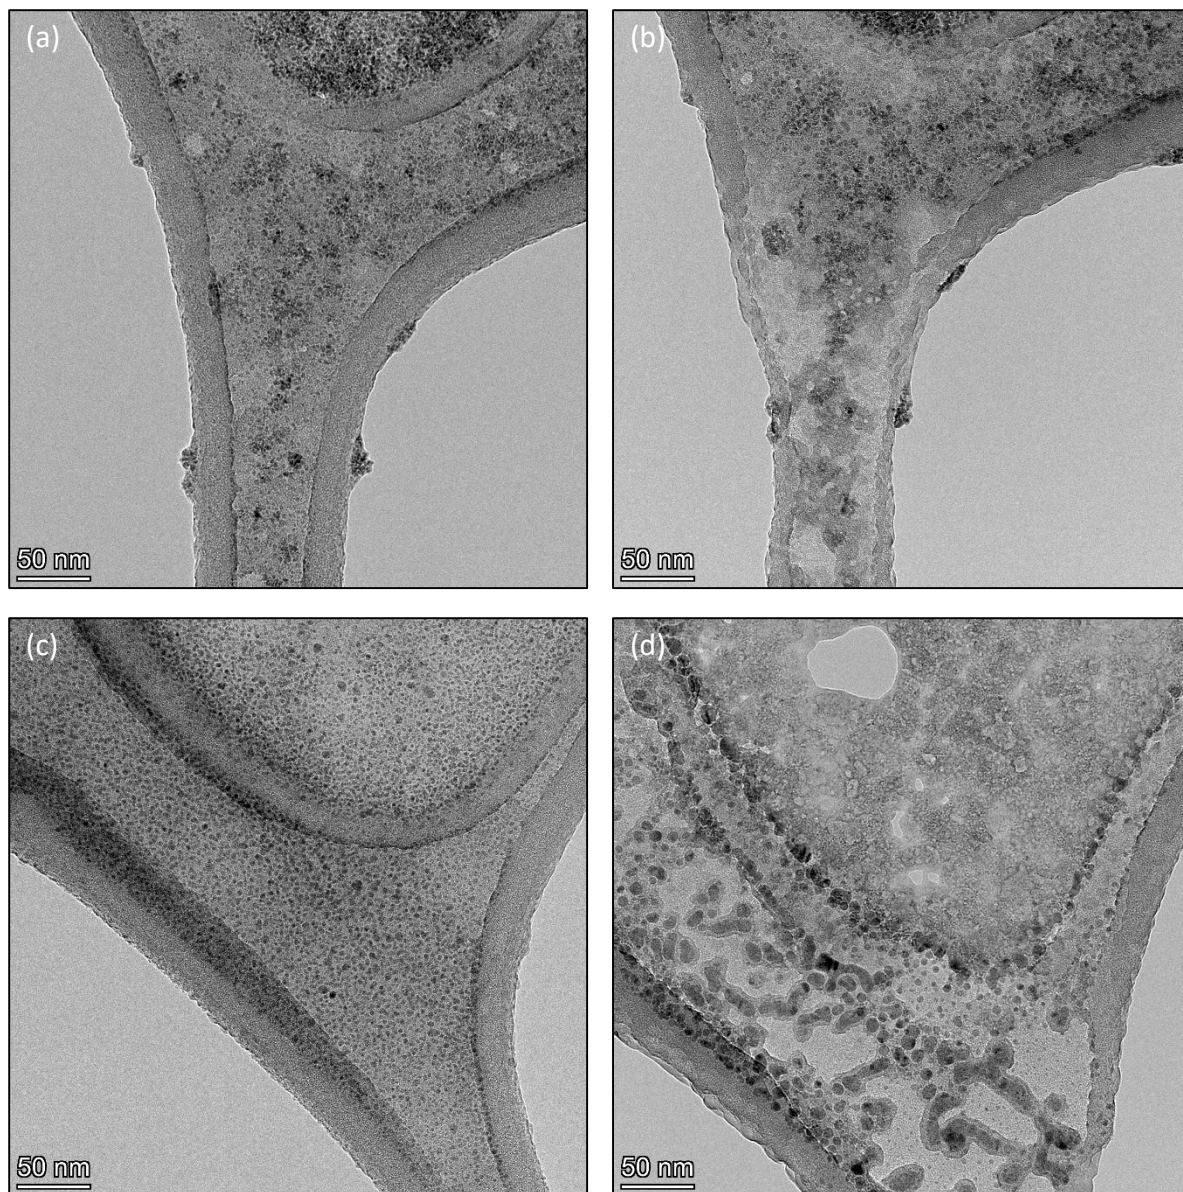

**Figure S2:** TEM images before and after electron beam exposure upon high magnification. Nanoceria particles exposed to (a) citric acid for two weeks in the dark pre-high magnification; (b) post-high magnification. Nanoceria particles exposed to (c) citric acid for eight weeks in the light pre-high magnification; (d) post-high magnification. The features were altered by the high-intensity electron beam.

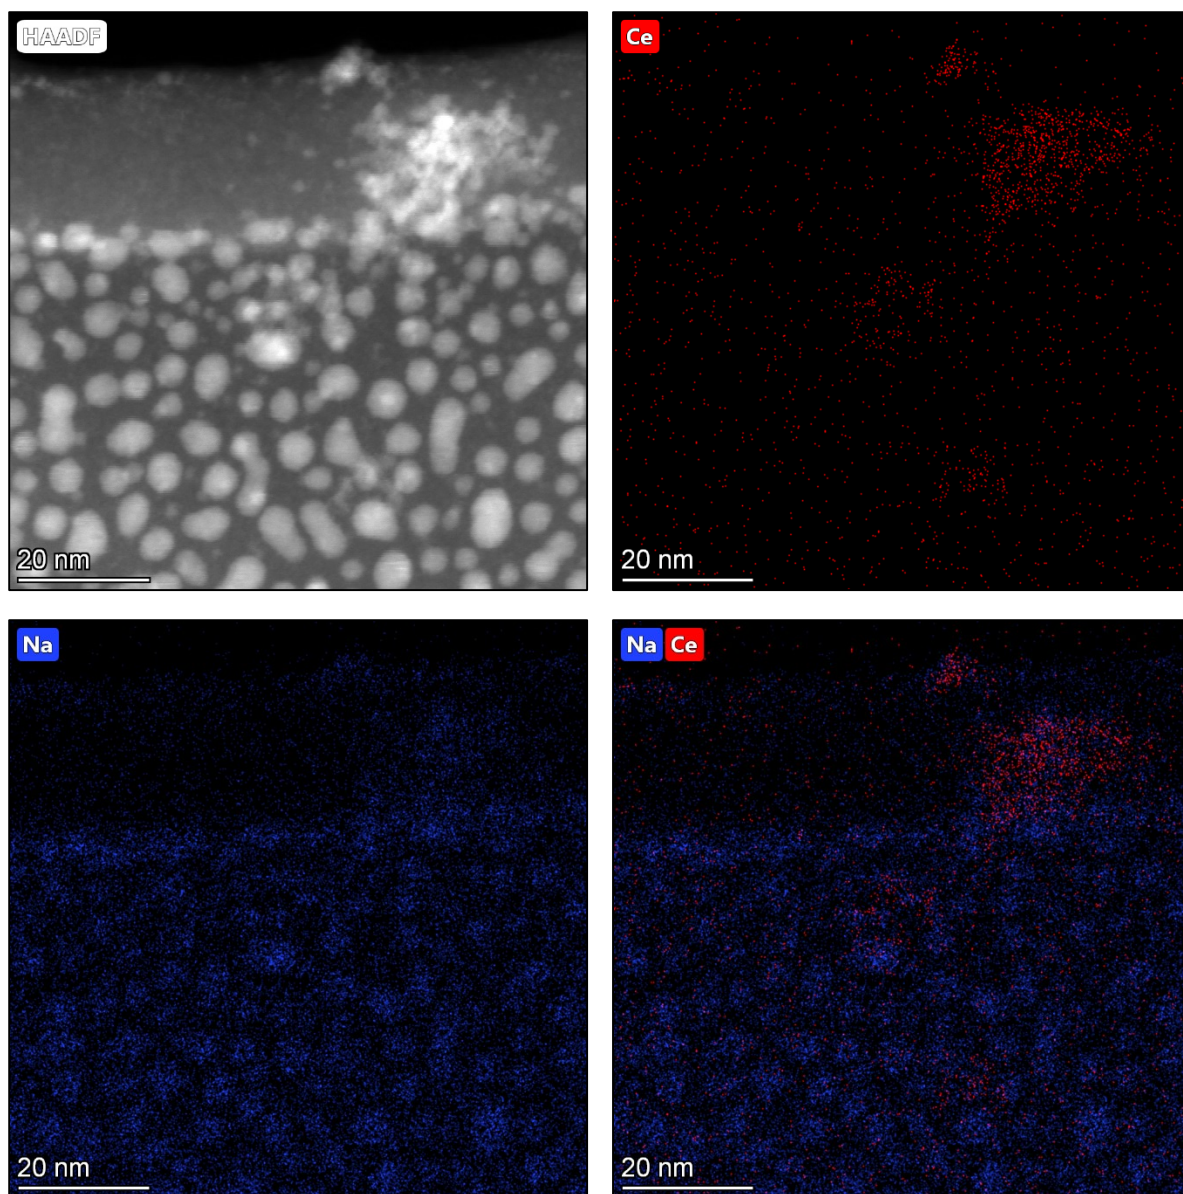

**Figure S3:** High-angle annular dark-field scanning transmission electron microscopy (HAADF-STEM) and EDS mapping of nanoceria exposed to  $\beta$ -hydroxybutyric acid and light for two weeks. The features contain sodium, but not cerium. The nanoceria appears to localize on the edges of the lacey carbon film as 15–25 nm agglomerates (upper right of the image).

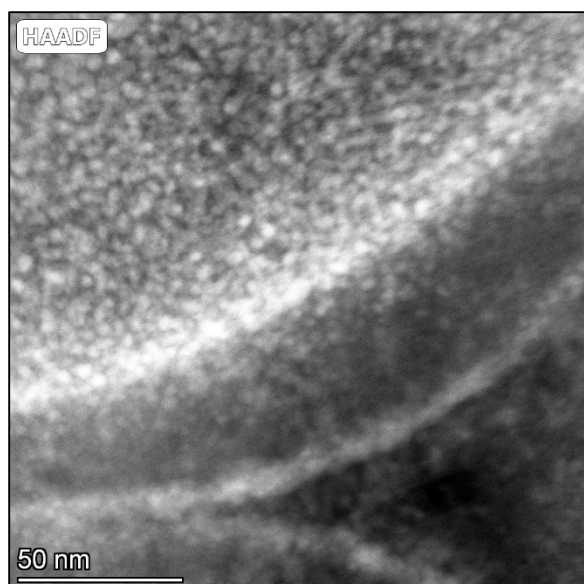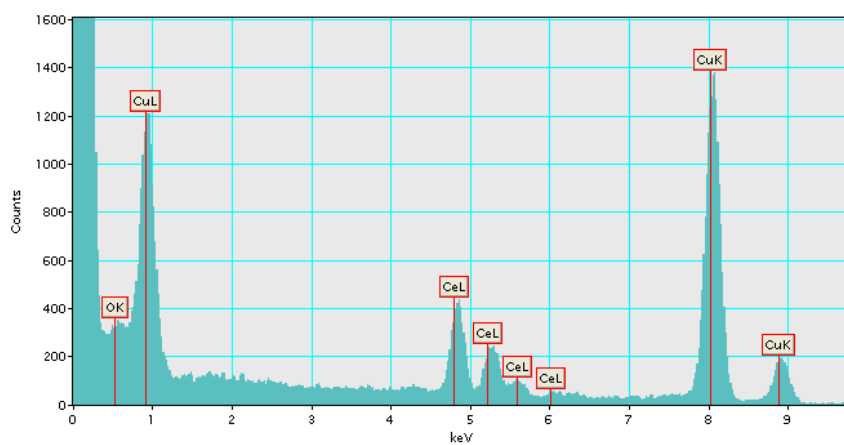

**Figure S4:** HAADF-STEM image and accompanying EDS map of nanoceria exposed to  $\beta$ -hydroxybutyric acid and light for four weeks. The sample contains cerium and oxygen confirming nanoceria particle agglomeration. Copper is from the sample grid.

**Table S1:** Quantitative DLS results for nanoceria in the presence of the twenty chemicals under two conditions, grouped by nanoceria stabilization/dissolution category shown in Figure 2 (categories separated by bold lines). Hydrodynamic diameters for each peak were recorded at times shown in the light (left column) and dark (right column) conditions. Two-way ANOVA of the first peak in light for all IDs revealed column factor results of  $F(19, 76) = 2.823$ ,  $P = 0.0007$ . Tukey multiple comparisons test of column means comparing citric, malic, isocitric, or glyceric acid to all other IDs showed each was significantly different ( $P < 0.01$ ) from  $\beta$ -hydroxybutyric and acetic acids.

| ID                              | Time (h) | Peak Diameter (nm)   |                      |                      |                      | ID                     | Time (h) | Peak Diameter (nm)   |                      |                      |                      |
|---------------------------------|----------|----------------------|----------------------|----------------------|----------------------|------------------------|----------|----------------------|----------------------|----------------------|----------------------|
|                                 |          | Light                |                      | Dark                 |                      |                        |          | Light                |                      | Dark                 |                      |
|                                 |          | 1 <sup>st</sup> Peak | 2 <sup>nd</sup> Peak | 1 <sup>st</sup> Peak | 2 <sup>nd</sup> Peak |                        |          | 1 <sup>st</sup> Peak | 2 <sup>nd</sup> Peak | 1 <sup>st</sup> Peak | 2 <sup>nd</sup> Peak |
| Citric Acid                     | 250      | 8.4                  | 30.7                 | 7.4                  | 18.7                 | Succinic Acid          | 250      | 12.2                 | 23.5                 | 15.1                 | 28.5                 |
|                                 | 500      | 3.9                  |                      | 7.8                  | 18.0                 |                        | 500      | 180.8                | 956                  | 9.1                  | 21.3                 |
|                                 | 1000     |                      |                      | 7.3                  | 17.3                 |                        | 1000     | 1553                 | 5961                 | 8.1                  | 19.7                 |
|                                 | 3000     |                      |                      | 5.9                  | 15.9                 |                        | 3000     | 1028                 | 4337                 | 8.0                  | 18.8                 |
|                                 | 5000     |                      |                      | 6.5                  | 16.6                 |                        | 5000     | 614                  | 2591                 | 4.7                  | 18.0                 |
| Malic Acid                      | 250      | 7.3                  | 16.3                 | 14.0                 | 37.8                 | Pimelic Acid           | 250      | 20.8                 | 46.7                 | 13.1                 | 26.2                 |
|                                 | 500      | 1.7                  | 12.3                 | 15.1                 | 35.4                 |                        | 500      | 658                  | 2416                 | 11.8                 | 22.7                 |
|                                 | 1000     |                      |                      | 14.7                 | 29.4                 |                        | 1000     | 275                  | 2266                 | 16.2                 | 33.8                 |
|                                 | 3000     |                      |                      | 12.2                 | 23.7                 |                        | 3000     | 1181                 | 4817                 | 13.4                 | 29.8                 |
|                                 | 5000     |                      |                      | 11.1                 | 25.9                 |                        | 5000     | 1013                 | 4226                 | 79.2                 | 2673                 |
| Isocitric Acid                  | 250      | 10.9                 | 22.4                 | 9.4                  | 21.1                 | Glutaric Acid          | 250      | 16.8                 | 35.8                 | 6.6                  | 17.4                 |
|                                 | 500      | 5.6                  | 20.0                 | 11.3                 | 21.7                 |                        | 500      | 1369                 | 4767                 | 6.6                  | 18.4                 |
|                                 | 1000     |                      |                      | 11.7                 | 22.1                 |                        | 1000     | 806                  | 3560                 | 6.4                  | 17.4                 |
|                                 | 3000     |                      |                      | 14.4                 | 36.8                 |                        | 3000     | 961                  | 4104                 | 25.6                 | 106.7                |
|                                 | 5000     |                      |                      | 13.3                 | 34.4                 |                        | 5000     | 643                  | 3097                 | 809                  | 3072                 |
| Glyceric Acid                   | 250      | 8.4                  | 20.4                 | 11.2                 | 24.5                 | Tricarbal-lylic Acid   | 250      | 107                  | 536                  | 6.4                  | 19.1                 |
|                                 | 500      | 7.9                  | 19.4                 | 12.1                 | 23.2                 |                        | 500      | 1325                 | 4794                 | 6.9                  | 19.0                 |
|                                 | 1000     | 4.9                  | 19.7                 | 12.3                 | 22.6                 |                        | 1000     | 1673                 | 4983                 | 6.0                  | 18.1                 |
|                                 | 3000     | 10.8                 | 24.4                 | 10.2                 | 21.2                 |                        | 3000     | 388                  | 1536                 | 10.2                 | 20.9                 |
|                                 | 5000     | 14.5                 | 32.7                 | 10.5                 | 22.0                 |                        | 5000     | 692                  | 2764                 | 302                  | 1461                 |
| Lactic Acid                     | 250      | 9.3                  | 20.9                 | 10.3                 | 21.3                 | Adipic Acid            | 250      | 12.3                 | 22.6                 | 10.3                 | 19.6                 |
|                                 | 500      | 9.5                  | 20.4                 | 9.0                  | 21.4                 |                        | 500      | 1105                 | 4663                 | 9.1                  | 19.4                 |
|                                 | 1000     | 10.7                 | 20.5                 | 6.9                  | 20.4                 |                        | 1000     | 774                  | 2195                 | 9.3                  | 18.3                 |
|                                 | 3000     | 2014                 | 9399                 | 4.6                  | 19.0                 |                        | 3000     | 793                  | 2877                 | 19.4                 | 49.1                 |
|                                 | 5000     | 913                  | 2412                 | 3.9                  | 19.0                 |                        | 5000     | 910                  | 3841                 | 831                  | 3047                 |
| Tartaric Acid                   | 250      | 6.7                  | 18.6                 | 12.2                 | 24.1                 | Acetic Acid            | 250      | 10.8                 | 20.9                 | 15.7                 | 28.8                 |
|                                 | 500      | 4.4                  | 19.1                 | 14.2                 | 26.6                 |                        | 500      | 1224                 | 3817                 | 7.8                  | 18.1                 |
|                                 | 1000     | 3.4                  | 19.9                 | 10.8                 | 21.7                 |                        | 1000     | 1365                 | 4222                 | 11.3                 | 20.3                 |
|                                 | 3000     | 656                  | 9040                 | 15.6                 |                      |                        | 3000     | 1666                 | 9358                 | 14.5                 | 44.0                 |
|                                 | 5000     | 883                  | 9140                 | 16.0                 |                      |                        | 5000     | 1696                 | 9340                 | 748                  | 2121                 |
| NH <sub>4</sub> NO <sub>3</sub> | 250      | 5.7                  | 19.4                 | 12.6                 | 25.0                 | NaNO <sub>3</sub>      | 250      | 13.2                 | 38.0                 | 13.8                 | 26.7                 |
|                                 | 500      | 6.3                  | 19.7                 | 14.0                 | 27.6                 |                        | 500      | 199                  | 3919                 | 9.1                  | 18.4                 |
|                                 | 1000     | 21.1                 | 48.2                 | 11.6                 | 20.9                 |                        | 1000     | 662                  | 2763                 | 7.9                  | 18.2                 |
|                                 | 3000     | 2486                 | 9479                 | 6.5                  | 18.9                 |                        | 3000     | 416                  | 3111                 | 8.1                  | 18.4                 |
|                                 | 5000     | 1262                 | 9262                 | 7.9                  | 17.8                 |                        | 5000     | 409                  | 6330                 | 8.7                  | 17.8                 |
| Water                           | 250      | 5.9                  | 19.8                 | 14.3                 | 34.0                 | Tartronic Acid         | 250      | 633                  | 1704                 | 1070                 | 6248                 |
|                                 | 500      | 5.0                  | 19.7                 | 14.3                 | 33.4                 |                        | 500      | 1429                 | 8056                 | 1134                 | 7779                 |
|                                 | 1000     | 10.6                 | 21.3                 | 14.5                 | 30.2                 |                        | 1000     | 1114                 | 7836                 | 680                  | 9052                 |
|                                 | 3000     | 493                  | 7285                 | 15.6                 | 34.6                 |                        | 3000     | 661                  | 9075                 | 526                  | 6566                 |
|                                 | 5000     | 275                  | 6606                 | 15.1                 | 31.0                 |                        | 5000     | 674                  | 2207                 | 209                  | 1508                 |
| α-Hydroxy-butyr-ic Acid         | 250      | 9.7                  | 20.6                 | 12.7                 | 24.9                 | Dihydroxy-malonic Acid | 250      | 485                  | 2792                 | 357                  | 1770                 |
|                                 | 500      | 14.9                 | 76.0                 | 13.2                 | 24.8                 |                        | 500      | 1822                 | 6850                 | 845                  | 4078                 |
|                                 | 1000     | 751                  | 2047                 | 11.4                 | 21.7                 |                        | 1000     | 1081                 | 7102                 | 1811                 | 8768                 |
|                                 | 3000     | 1776                 | 6711                 | 9.9                  | 21.7                 |                        | 3000     | 640                  | 2939                 | 861                  | 5679                 |
|                                 | 5000     | 1291                 | 4475                 | 10.9                 | 20.9                 |                        | 5000     | 222                  | 2006                 | 1200                 | 4631                 |
| β-Hydroxy-butyr-ic Acid         | 250      | 11.7                 | 23.4                 | 11.1                 | 22.9                 | Ascorbic Acid          | 250      | 113                  | 486                  | 60.4                 | 161                  |
|                                 | 500      | 29.1                 | 92.5                 | 8.8                  | 21.3                 |                        | 500      | 1385                 | 7961                 | 1142                 | 7066                 |
|                                 | 1000     | 2353                 | 8947                 | 8.8                  | 21.1                 |                        | 1000     | 1215                 | 7765                 | 1277                 | 5488                 |
|                                 | 3000     | 2189                 | 9432                 | 11.7                 | 23.0                 |                        | 3000     | 1646                 | 8349                 | 1525                 | 5987                 |
|                                 | 5000     | 1705                 | 8154                 | 5.4                  | 19.5                 |                        | 5000     | 85.6                 | 613                  | 168                  | 401                  |

**Table S2:** The number of carboxylic acid groups (CA), total number of carbons (C), aliphatic carbons (AC), and hydroxy groups (OH) in each molecule are shown. The molecular ratios were calculated and used to compare amongst each other. The acids that totally dissolved nanoceria in the presence of light (citric, malic, and isocitric) had at least two CA and three OH groups, and a ratio greater than or equal to  $1\frac{1}{2}$  CA:AC and 2 OH:AC. These numbers and ratios were greater than the other acids in this study.

| ID                            | CA | C | AC | OH | Molecular Ratios |       |       |       |
|-------------------------------|----|---|----|----|------------------|-------|-------|-------|
|                               |    |   |    |    | CA:C             | CA:AC | OH:C  | OH:AC |
| Citric Acid                   | 3  | 6 | 2  | 4  | 1/2              | 1 1/2 | 2/3   | 2     |
| Malic Acid                    | 2  | 4 | 1  | 3  | 1/2              | 2     | 3/4   | 3     |
| Isocitric Acid                | 3  | 6 | 2  | 4  | 1/2              | 1 1/2 | 2/3   | 2     |
| Glyceric Acid                 | 1  | 3 | 0  | 3  | 1/3              |       | 1     |       |
| Lactic Acid                   | 1  | 3 | 1  | 2  | 1/3              | 1     | 2/3   | 2     |
| Tartaric Acid                 | 2  | 4 | 0  | 4  | 1/2              |       | 1     |       |
| $\alpha$ -Hydroxybutyric Acid | 1  | 4 | 2  | 2  | 1/4              | 1/2   | 1/2   | 1     |
| $\beta$ -Hydroxybutyric Acid  | 1  | 4 | 2  | 2  | 1/4              | 1/2   | 1/2   | 1     |
| Succinic Acid                 | 2  | 4 | 2  | 2  | 1/2              | 1     | 1/2   | 1     |
| Pimelic Acid                  | 2  | 7 | 5  | 2  | 2/7              | 2/5   | 2/7   | 2/5   |
| Glutaric Acid                 | 2  | 5 | 3  | 2  | 2/5              | 2/3   | 2/5   | 2/3   |
| Tricarballic Acid             | 3  | 6 | 3  | 3  | 1/2              | 1     | 1/2   | 1     |
| Adipic Acid                   | 3  | 6 | 4  | 2  | 1/2              | 3/4   | 1/3   | 1/2   |
| Acetic Acid                   | 1  | 2 | 1  | 1  | 1/2              | 1     | 1/2   | 1     |
| Tartronic Acid                | 2  | 3 | 0  | 3  | 2/3              |       | 1     |       |
| Dihydroxymalonic Acid         | 2  | 3 | 0  | 4  | 2/3              |       | 1 1/3 |       |
